# Supplementary material for: Electrochemical study of specially designed graphene-Fe3O4-polyaniline nanocomposite as a high-performance anode for lithium-ion battery
Source: Royal Society of Chemistry journal article supplement (doi:10.1039/c8dt03107j), 2018-01-01
Supplement: c8dt03107j1.pdf [file c8dt03107j1.pdf]

## Supporting Information

### Figure Captions

*Fig. S1: HRTEM of Gr-Fe<sub>3</sub>O<sub>4</sub>-PANI NCs*

*Fig. S2: SEM image of Gr-Fe<sub>3</sub>O<sub>4</sub>-PANI NC after charge discharge test*

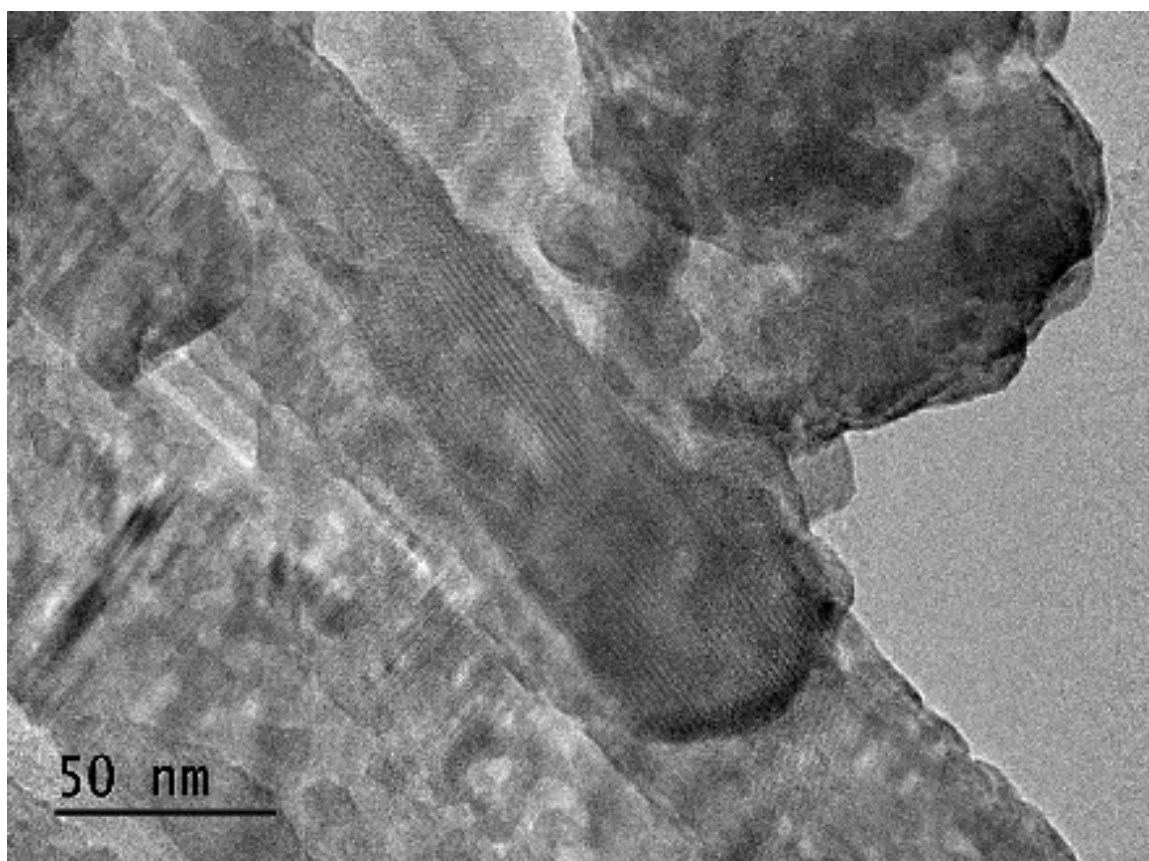

*Fig. S1: HRTEM of Gr-Fe<sub>3</sub>O<sub>4</sub>-PANI NCs*

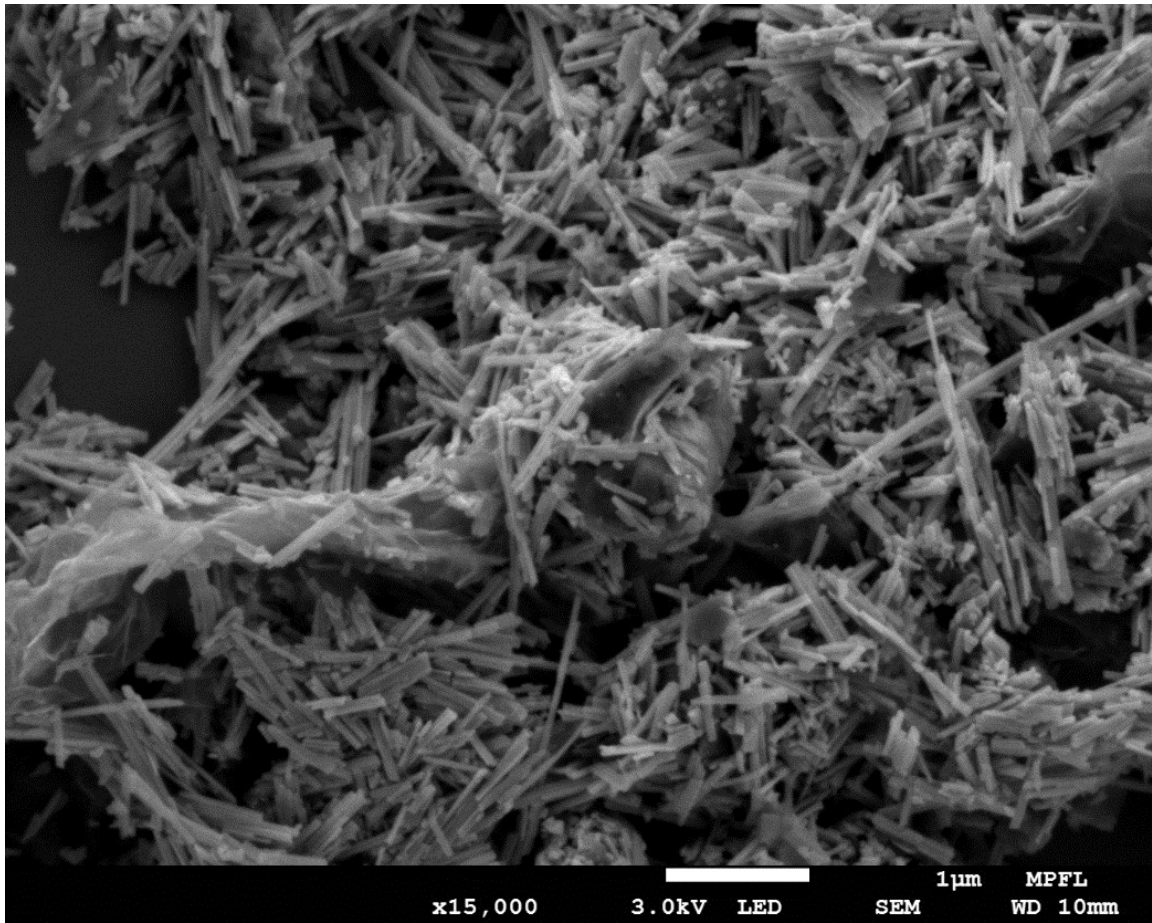

*Fig. S2: SEM image of Gr-Fe<sub>3</sub>O<sub>4</sub>-PANI NC after charge discharge test*
